# Supplementary material
Source: publisher figshare collection journal article supplement (https://tandf.figshare.com/ndownloader/files/14883380)

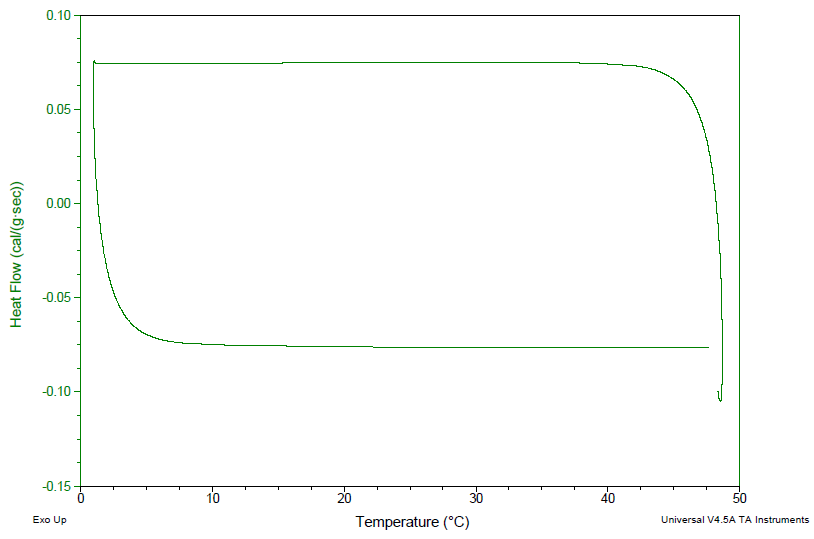

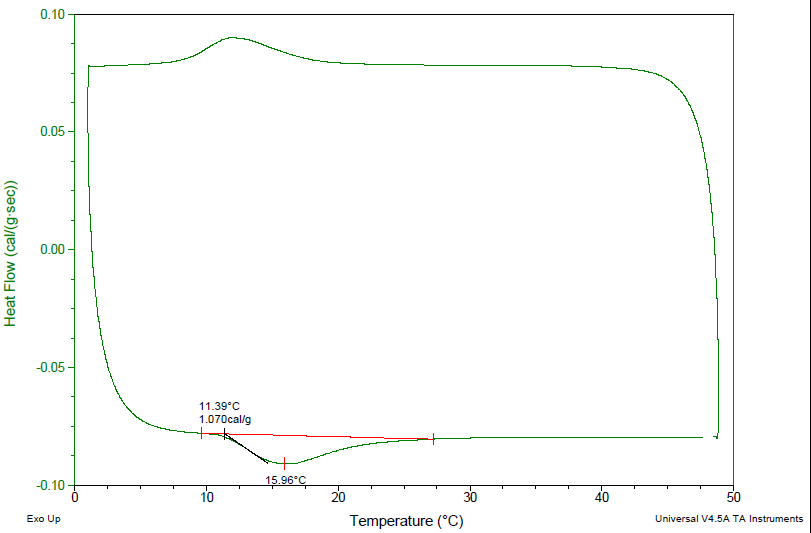

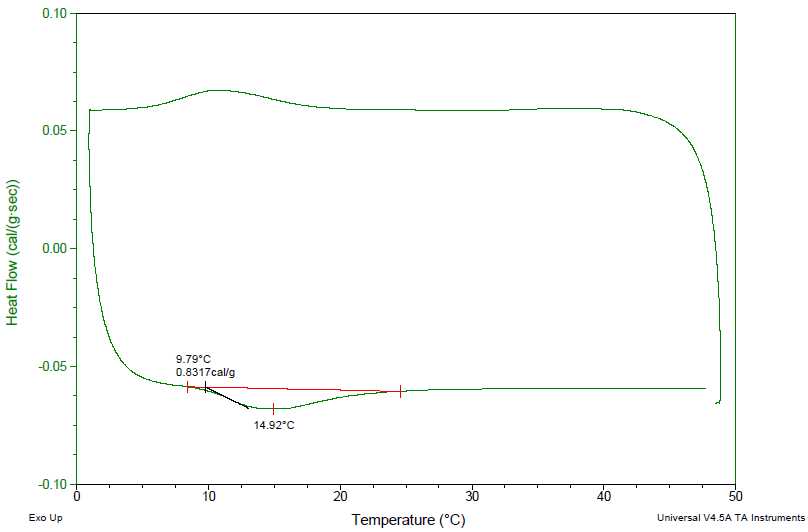

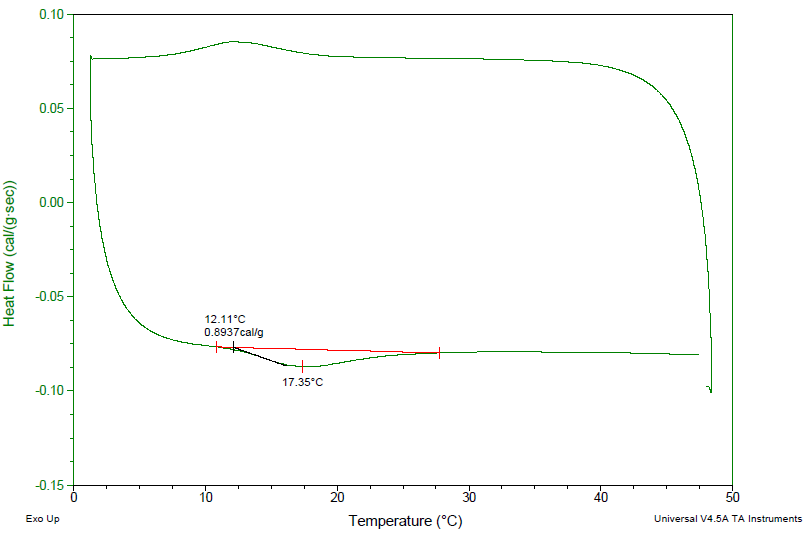


**CS-TPP nano**

**CS-TPP nano-PL407 (18 %)**

**CS-TPP nano-PL407 (20 %)**

**CS-TPP nano-PL407-PL403 (18-2 %)**

Supplement: Supplementary file 1 [file 14883380]
